1 Hypomethylation in *FASTKD1* detected in the association between *in utero* tobacco  
2 exposure and conduct problem in a New Zealand longitudinal study

3

4 Alexandra J. Noble<sup>1</sup>, John F. Pearson<sup>2</sup>, Joseph M. Boden<sup>3</sup>, L. John Horwood<sup>3</sup>,  
5 Martin A. Kennedy<sup>2</sup>, Amy J. Osborne<sup>1</sup>

6

7

8 <sup>1</sup> School of Biological Sciences, University of Canterbury, Christchurch, New Zealand

9 <sup>2</sup> Department of Pathology and Biomedical Science, University of Otago,  
10 Christchurch, New Zealand

11 <sup>3</sup> Department of Psychological Medicine, University of Otago, Christchurch, New  
12 Zealand

13 [Alexandra.noble@pg.canterbury.ac.nz](mailto:Alexandra.noble@pg.canterbury.ac.nz)

14

15

16

17

18

19

20

21

22

23

24

25

26

27

28

29

30

31

32

33

34 Abstract

35 Despite the known adverse effects of *in utero* tobacco exposure on offspring health,  
36 maternal tobacco use during pregnancy remains prevalent and is a major driver of  
37 health inequalities. One such health inequality is the development of conduct  
38 problem (CP) in exposed offspring which may be mediated by methylation changes  
39 that persist into adulthood. Here we apply a genome-wide approach to probe the  
40 association between maternal tobacco use during pregnancy and CP outcomes in  
41 exposed offspring. We examined maternal tobacco use during pregnancy (*in utero*  
42 exposure) in the Christchurch Health and Development Study, a longitudinal birth  
43 cohort studied for over 40 years. We then evaluated the interaction between  
44 methylation effects of *in utero* exposure and CP score. When modelling this  
45 interaction between *in utero* exposure and CP score we detected nominal DNA  
46 methylation differences, at *FASTKD1* which has roles in early development. Our  
47 observations are consistent with DNA methylation mediating the development of CP  
48 following *in utero* tobacco exposure. In addition, we detected nominal significance in  
49 *FRMDA4* and *MYO1G* between individuals exposed to tobacco *in utero* and those  
50 that were unexposed, however these did not reach significance after adjustment for  
51 multiple testing. However due to limited power in our analysis, further studies are  
52 needed to investigate the interaction between *in utero* tobacco exposure and high  
53 CP health outcomes.

54

55

56

57

58

59

60

61

62

63

64

65

66

67 Introduction

68

69 The use of tobacco during pregnancy is one of the leading causes of perinatal  
70 compromise for developing offspring, and one of the most preventable [1]. For  
71 example, low birth weight [2], congenital heart anomalies [3], asthma/respiratory  
72 illness [4, 5], and sudden infant death syndrome (SIDS) [6] are all associated with  
73 maternal tobacco use during pregnancy, the rate of which remains relatively high in  
74 New Zealand (18.4% [7]), despite declining tobacco use rates overall [8].

75

76 While immediate perinatal compromise in infants due to maternal smoking is well  
77 documented, the long-term effects into later childhood, adolescence and adulthood  
78 are not understood. Maternal tobacco use in pregnancy has been associated with  
79 later risks of mental health and related adjustment problems in childhood and  
80 adolescence [9, 10]. Further, there is also evidence that maternal smoking during  
81 pregnancy is associated with increased risks of conduct disorders and antisocial  
82 behaviours in offspring [11] [12-14]. This association is not explained by postnatal  
83 environment [15]. Further associations have been identified between maternal  
84 tobacco use during pregnancy and the increased risk of the development of  
85 attention-deficit hyperactivity disorder (ADHD) [16]. Also affected are offspring  
86 neurodevelopment and behaviour, suggesting that poor behavioural adjustment  
87 (often termed 'conduct problems', CP) can be considered a consequence of  
88 maternal smoking during pregnancy [11]. While these traits can be linked to other  
89 societal risk factors such as low socioeconomic status and early-life adversity [17],  
90 their association with maternal tobacco use during pregnancy is intriguing. Tobacco  
91 smoking is a strong modifier of DNA methylation [18-20]. We propose that tobacco  
92 use during pregnancy could act on CP risk from *in utero* exposure on DNA  
93 methylation. Understanding this association is crucial for furthering the paradigm of  
94 the developmental origins of human health and disease (DOHaD) [21].

95 Overall there is a better understanding of the impact of *in utero* tobacco exposure on  
96 DNA methylation and only limited preliminary work has been carried out on the  
97 interaction between *in utero* tobacco exposure and the onset of CP [22]. Recent

98 research has demonstrated links between prenatal tobacco exposure and specific  
99 DNA methylation patterns of newborn offspring [23-26]. Importantly, tobacco-induced  
100 DNA methylation changes can persist into adolescence [27] [26, 28]. Further, meta-  
101 analyses of multiple CpG sites in the gene *GFI1* (Growth Factor Independent one  
102 transcriptional repressor) were found to be differentially methylated in adult offspring  
103 in response to being exposed to tobacco *in utero* [29]. In contrast, the role of DNA  
104 methylation in the association between *in utero* tobacco exposure and CP is less  
105 clear. Preliminary work by Sengupta et al. [22] found three loci with modest DNA  
106 methylation changes in response to maternal tobacco use during pregnancy and CP  
107 phenotypes, but the etiology of this link has not been fully explored. One potential  
108 mechanism is that differential DNA methylation induced during the *in utero* period is  
109 influencing the development of CP in childhood.

110

111 Here we hypothesise that given maternal tobacco use during pregnancy has been  
112 previously linked to offspring CP during early childhood and adolescence, and that  
113 maternal tobacco use during pregnancy can affect DNA methylation of offspring  
114 through to adolescence and adulthood, that DNA methylation is altered at genes that  
115 have biological relevance for CP phenotypes, in the whole blood of adults who were  
116 exposed to tobacco *in utero*. To test this hypothesis, we used the Illumina EPIC  
117 array to interrogate differential methylation in the DNA of participants from the  
118 Christchurch Health and Development Study (CHDS) whose mothers consumed  
119 tobacco during pregnancy.

120

## 121 Methods

122 A cohort of 109 participants from the CHDS (N= 1265 in total) gave blood samples at  
123 about age 28 which were used for Illumina EPIC array analysis (Table 1). CHDS  
124 participants were chosen based on their *in utero* tobacco exposure status, their adult  
125 smoking status, and their CP scores. The *in utero* tobacco exposure was defined as  
126 10+ cigarettes per day throughout pregnancy. A total of 49 individuals fitted this  
127 description. Within this group, 23 of the participants were also adult smokers. A total  
128 number of 60 individuals were used for the non-exposed control group. Eight of  
129 these participants were adult smokers. Furthermore, in both the exposed and non-  
130 exposed groups there were individuals who were selected with either a 'high' or 'low'

131 score on a measure of childhood CP at age 7-9 years. Severity of childhood CP was  
132 assessed using an instrument that combined selected items from the Rutter and  
133 Conners child behaviour checklists [30-33] as completed by parents and teachers at  
134 annual intervals from 7-9 years. Parental and teacher reports were summed and  
135 averaged over the three years [34] to derive a robust scale measure of the extent to  
136 which the child exhibited conduct disordered/oppositional behaviours (mean (SD)=  
137 50.1 (7.9), range 41-97). For the purposes of this report a 'high' score was defined  
138 as falling into the top quartile of the score distribution (scores > 53) and a 'low' score  
139 was defined as < 46.

140 All samples taken were whole blood and collected at approximately 28 years old,  
141 and DNA extractions were conducted using the Kingfisher Flex System (Thermo  
142 Scientific, Waltham, MA USA), as per the published protocols. DNA was quantified  
143 via NanoDrop™ (Thermo Scientific, Waltham, MA USA) and standardised to  
144 100ng/μl. Equimolar amounts were shipped to the Australian Genomics Research  
145 Facility (AGRF, Melbourne, VIC, Australia) for processing via the Infinium®  
146 Methylation EPIC BeadChip (Illumina, San Diego, CA USA). The arrays were carried  
147 out in groups over three batches. One in 2016, one in 2017 and another in 2020.  
148 Analysis was carried out in R statistical software (Version 3.5.2). Quality control  
149 checks were performed on the raw data, firstly sex chromosomes and a total of 90  
150 failed probes (detection P value of < 0.01 in at least 50% of samples) were excluded  
151 from the analysis. CpG sites known to be problematic due to adjacent single  
152 nucleotide variants or which did not map to a location in the genome were also  
153 excluded [35]. This left a total of 699,916 CpG sites for further analysis. Pre-  
154 processing was performed using Noob [36]. Normalisation was then visually  
155 inspected for performance using beta density distribution plots and Multi-dimensional  
156 scaling of the 5,000 most variable CpG sites. Hierarchical regression was used to  
157 investigate the best linear model to be fitted to the methylated/unmethylated or M  
158 ratios. The two following models were picked as the most robust equations to assess  
159 for differential DNA methylation for our data set.

160 *In utero* exposed only (model 1)

$$Y = \textit{In utero exposed} + \textit{year array was sampled} (3) + \textit{principal components} (4) \\ + \textit{adult smoking status} + \textit{sex} + \textit{social economic status} (3)$$

161 *In utero* exposed with the interaction of CP (model 2)

$$Y = \textit{In utero exposed} + \textit{CP} + \textit{year array was sampled} (3) \\ + \textit{principal components} (4) + \textit{adult smoking status} + \textit{sex} \\ + \textit{social economic status} (3) + \textit{in utero exposed: CP}$$

162

163 Analysis corrected for the following variables: i) year array was sampled (3 levels),  
164 and; ii) population stratification (four principal components from 5000 most variable  
165 SNPs [37]), adult tobacco status (bivariate), sex (bivariate), socioeconomic status  
166 (three levels). Q-Q plots of the residuals were also used to generate lambda values  
167 to assess for over-inflation. Linear regression models were used to generate the top  
168 tables of differentially methylated CpG sites and were corrected for multiple testing  
169 using the Benjamini-Hochberg method (BH). Differentially methylated CpG sites that  
170 were intergenic were matched to the nearest neighbouring genes in Hg19 using the  
171 R package GenomicRanges [38]. The package ggplot (Version 3.3.2) was used to  
172 construct all dotplot graphs [39], with the log transformed normalised methylated and  
173 unmethylated values plotted.

174

175

176

177

178

179

180

181

182

183

184

185

186

## 187 Results

188

### 189 Data analysis

190

191 Both the *in utero* exposed only (model 1), and the *in utero* exposed with the  
192 interaction of CP (model 2) were assessed for genomic inflation via Q-Q plots  
193 (Supplementary Figure 1A and B). No significant indication of inflation was observed  
194 for either of the two models: *in utero* exposed only with  $\lambda = 0.97$  (Supplementary  
195 Figure 1A) and *in utero* exposed with the interaction of CP with  $\lambda = 1.03$   
196 (Supplementary Figure 1B).

197

198 Methylation differences from *in utero* exposed only individuals compared to non-  
199 exposed controls (model 1)

200

201 Firstly, differences in DNA methylation in response to *in utero* exposure were  
202 assessed, while adjusting for year array was sampled, four principal components,  
203 adult tobacco smoking status, sex, and socioeconomic status. Results of this  
204 analysis identified nominally significant differential DNA methylation between  
205 individuals exposed to tobacco *in utero* compared to the non-exposed control group.  
206 A total of 653 CpG sites had a P value less than 0.001, of these 222 were  
207 hypomethylated and the rest (431) were hypermethylated.

208 Top tables of the most significant CpG sites were then constructed; the top 30 CpG  
209 sites are displayed in Table 2. Several nominally significant CpG sites were  
210 observed, although none were significant after adjustment for multiple testing. The  
211 top five differentially methylated sites resided in four genes: two sites in *FRMD4A*  
212 (5.1% and 4.6% differentially methylated), and one each in *MYOG1* (7.4% differential  
213 methylation), *WIPF3* (3.1% differential methylation) and *RTN1* (3.1% differential  
214 methylation). At all five of these CpG sites, differences decreased, indicating  
215 hypomethylation in response to *in utero* tobacco exposure. This same trend is  
216 observed in the other remaining top CpG sites, as 28/30 were hypomethylated but

217 not significant in the exposed group. This is further illustrated by scatter plots of the  
218 top four most significant CpG sites in Figure 1.

219

220 Methylation differences between *in utero* exposed with the interaction of conduct  
221 problems (model 2)

222

223 To investigate genome-wide differential methylation specific to the interaction  
224 between *in utero* tobacco exposure and CP score, we determined differential  
225 methylation between i) individuals with high CP vs. low CP scores who were  
226 exposed to tobacco *in utero*, and; ii) individuals with high or low CP scores who were  
227 not exposed to tobacco *in utero*). Dividing the data in this way allowed us to  
228 specifically ask whether exposure to tobacco *in utero* may be associated with a high  
229 CP score as a result of an alteration to DNA methylation.

230 Top tables of the most significantly differentially methylated CpG sites were  
231 constructed (model 2), with the top 30 CpG sites displayed in Table 3. No CpG sites  
232 were found to be significant after adjustment for multiple testing. Within the top 30  
233 CpG sites, an even split was seen between hypo and hypermethylation. The  
234 magnitude of the differential methylation in the *in utero* exposed low vs. high CP, and  
235 the non-exposed low vs. high CP under the interaction model are all less than 1.2%.  
236 The top four most differentially methylated sites under this interaction are plotted in  
237 Figure 2 (CpG site cg12163448 in *FASTKD1*, cg01210554 with no known associated  
238 gene, cg13339919 in *SLC10A7* and cg21516989 in *LPIN1* on individual plots).  
239 Scatter plots, overlaid with a box, are fitted to the four subcategories for each CpG  
240 site: i) non- exposed low CP; ii) non-exposed high CP; iii) *in utero* exposed low CP,  
241 and; iv) *in utero* exposed high CP. Each of the four subcategories here has a range  
242 of methylation values for the individuals within the group.

243

244

245 Discussion



246 The effect of *in utero* tobacco exposure has been widely found to induce differential  
247 DNA methylation marks in the genomes of exposed offspring, however much of what  
248 we know comes from studies involving infants and young children. Here, we  
249 investigated the effect of *in utero* tobacco exposure on DNA methylation in the blood  
250 of adult New Zealanders who were exposed to tobacco during development and  
251 explored the association between exposure during development with a high conduct  
252 problem score in childhood and adolescence.

253 Firstly, we assessed the effect of exposure to tobacco *in utero* on offspring DNA  
254 methylation, compared to non-exposed controls, without the interaction of CP score.  
255 No CpG sites reached an adjusted P value of significance (Table 2). However, the  
256 top nominally significant CpG sites were found in the genes *FRMD4A*, *MYO1G*,  
257 *WIPF3*, and *RTN1*. CpG sites in genes *MYO1G* and *FRMD4A* have been previously  
258 found to be differentially methylated in response to maternal smoking during  
259 pregnancy [40-42]. However, the CpG sites cg20745684 and cg01604380 within the  
260 genes *WIPF3* and *RTN1* respectively have not been implicated in any previous  
261 study.

262 Myosin 1G (*MYO1G*) and FERM Domain Containing 4A (*FRMD4A*) are more  
263 established biomarkers for *in utero* tobacco exposure [40-42]. However, these prior  
264 results come from the analysis of DNA methylation during childhood. Here, we show  
265 that methylation differences at these well-established biomarkers, in response to *in*  
266 *utero* tobacco exposure, are detectable in exposed individuals through to adulthood  
267 (age ~28 years), therefore our results expand on this current knowledge by  
268 demonstrating a potential for long-term stability of developmentally-induced  
269 methylation. We suggest that *MYO1G* and *FRMD4A* are specifically differentially  
270 methylated in response to maternal tobacco use during pregnancy, and that these  
271 methylation changes induced *in utero* appear to be stable into adulthood. Knowledge  
272 of the longevity of potentially developmentally-induced methylation marks may be  
273 important for understanding later-life disease risk, particularly given the association  
274 between *MYO1G* and immunity [43] and *FRMD4A* [44] with Alzheimer's disease.

275 Secondly, we assessed the interaction between *in utero* tobacco exposure and CP in  
276 exposed offspring on DNA methylation. Thus far, limited evidence has provided a  
277 molecular mechanism of the known association between maternal tobacco use

278 during pregnancy and the development of CP in exposed offspring. While no CpG  
279 sites displayed genome-wide significance under this interaction model, nominal  
280 significance was observed. Beta differences within the top 30 most nominally ( $P <$   
281 0.01) significant CpG sites were small, with the largest being 1.2%. The most  
282 differentially methylated CpG sites resided in the following genes: *FASTKD1*,  
283 *SLC10A7* and *LP1N1*.

284 Methylation at the CpG site in FAST Kinase domain 1 (*FASTKD1*) was elevated in  
285 those with high CP scores only in the exposed group (Figure 2). No methylation  
286 differences were found in those not exposed to maternal tobacco. Thus, this site in  
287 *FASTKD1* is a possible mediator of the known effect of maternal tobacco on CP.  
288 *FASTKD1* plays a role in the regulation of mitochondrial RNA [45, 46]. Single  
289 nucleotide variants within this gene have been associated with glaucoma [47],  
290 furthermore, this is evidence to suggest that children with vision impairment are more  
291 likely to be diagnosed with disorders such as ADHD than those that do not [48].

292 Solute Carrier Family 10 Member 7 (*SLC10A7*), Lipin 1 (*LPIN1*) and Laminin gamma  
293 3 (*LAMC3*) also contained top differentially methylated CpG sites. However, the  
294 interaction here is different to what was observed in *FASTKD1*. Differences in  
295 methylation are seen in the unexposed CP group. Thus, we hypothesise that these  
296 sites may be driven more so by unexposed high CP when compared to the exposed  
297 groups rather than the interaction of only exposed high CP. Furthermore, these  
298 genes do have functional relevance to the high CP phenotype. Single nucleotide  
299 variances in *LIPIN1* have been associated with neurofibrillary tangles which is a  
300 pathological protein aggregate found in Alzheimer's disease [49]. *LAMC3* has  
301 diverse roles in cell migration, apoptosis and adhesion, and variants within this gene  
302 have been found to contribute to cortical malformations [50-52]. It has been reported  
303 that individuals with these variants also have specific behavioural outcomes, e.g.,  
304 impairments in endogenous attentional processes [51], which collectively suggests  
305 that these data may have biological relevance to the CP phenotype.

306 Therefore, while we detect biologically relevant nominally significant interactions  
307 between DNA methylation at individual CpG sites and high CP score in individuals  
308 exposed to tobacco *in utero*, further work is required to better characterise the  
309 precise mechanism of CP development. CP is a highly complex phenomenon that

310 encompasses a range of phenotypes [53], which will have a range of aetiologies.  
311 Hence the mechanism of CP development for non-exposed individuals with high CP  
312 is likely to be different to the individuals who were exposed to maternal tobacco  
313 smoke with the same phenotype. Our data identify potential epigenetic changes that  
314 could mediate the association between maternal smoking and conduct problems  
315 which persist into adulthood. These candidates require confirmation in larger  
316 independent studies.

317

### 318 Conclusion

319 Our findings here suggest that DNA methylation could be involved in the link  
320 between *in utero* tobacco exposure and conduct problems. While we were unable to  
321 identify genome wide differences in our cohort (N= 109), our results indicate that it  
322 would be beneficial to explore our nominal associations in a larger cohort. Further  
323 findings may help to elucidate the detrimental effect that *in utero* tobacco exposure  
324 has on the genome of exposed individuals, and suggest that disease associated  
325 DNA methylation which occurs early in the life course persists into adulthood.

326 Ethics approval and consent to participate.

327

328 All aspects of the study were approved by the Southern Health and Disability Ethics  
329 Committee, under application number CTB/04/11/234/AM10 “Collection of DNA in  
330 the Christchurch Health and Development Study”.

331

### 332 Funding

333

334 Seed grant - College of Science New Ideas Seed Grant to AJO.

335 CHDS was funded by the Health Research Council of New Zealand (Programme  
336 Grant 16/600)

337 CMRF provided the funding to write up the findings of this study.

338

339 Table 1 Cohort characteristics of the subset of individuals (n = 109) used to assess differential DNA  
340 methylation and *in utero* tobacco exposure, and their matched controls, all from the CHDS.

341

342

343

344

345

346

347

348

349

350

351

352

353

354

355

356

357

358

359

|                                  | <i>In utero</i> tobacco<br>exposed group<br>N= 49 | Non-exposed<br>control group<br>N= 60 |
|----------------------------------|---------------------------------------------------|---------------------------------------|
| Sex                              |                                                   |                                       |
| Male                             | 36                                                | 46                                    |
| Female                           | 13                                                | 14                                    |
| Paternal<br>socioeconomic status |                                                   |                                       |
| 1                                | 3                                                 | 13                                    |
| 2                                | 21                                                | 30                                    |
| 3                                | 25                                                | 17                                    |
| Adult tobacco smoking<br>status  |                                                   |                                       |
| Never smoker                     | 26                                                | 52                                    |
| Regular<br>smoker                | 23                                                | 8                                     |
| Conduct problem<br>score (CP)    |                                                   |                                       |
| Low CP (< 46)                    | 26                                                | 41                                    |
| High CP (> 53)                   | 23                                                | 19                                    |

360 Table 2 Top differentially methylated CpG sites to *in utero* tobacco exposure in offspring. Beta values  
 361 with P values, nominal and adjusted by the Benjamini and Hochberg method. Locations are relative to  
 362 hg19 with gene names for overlapping genes or nearest 5'.

363

| Illumina ID | Gene            | Chromosome | Non exposed | Exposed | Difference | P value  | Adjusted P value |
|-------------|-----------------|------------|-------------|---------|------------|----------|------------------|
| cg25464840  | <i>FRMD4A</i>   | 10         | 0.708       | 0.755   | 0.047      | 6.14E-07 | 0.247            |
| cg15507334  | <i>FRMD4A</i>   | 10         | 0.598       | 0.649   | 0.051      | 7.06E-07 | 0.247            |
| cg04180046  | <i>MYO1G</i>    | 7          | 0.513       | 0.587   | 0.074      | 1.45E-06 | 0.337            |
| cg20745684  | <i>WIPF3</i>    | 7          | 0.254       | 0.285   | 0.031      | 2.04E-06 | 0.356            |
| cg01604380  | <i>RTN1</i>     | 14         | 0.218       | 0.250   | 0.032      | 2.67E-06 | 0.374            |
| cg22931725  | <i>FMN2</i>     | 1          | 0.051       | 0.059   | 0.008      | 3.75E-06 | 0.391            |
| cg06284231  | <i>CLEC14A</i>  | 14         | 0.161       | 0.183   | 0.023      | 4.07E-06 | 0.391            |
| cg02721176  | <i>C10orf96</i> | 10         | 0.300       | 0.363   | 0.064      | 4.95E-06 | 0.391            |
| cg02841155  | <i>SLC27A6</i>  | 5          | 0.257       | 0.304   | 0.047      | 5.37E-06 | 0.391            |
| cg27339941  |                 | 9          | 0.562       | 0.600   | 0.038      | 5.59E-06 | 0.391            |
| cg01026094  |                 | 20         | 0.284       | 0.322   | 0.038      | 6.36E-06 | 0.405            |
| cg24601030  | <i>DIXDC1</i>   | 11         | 0.756       | 0.797   | 0.041      | 8.04E-06 | 0.469            |
| cg15433297  | <i>PKHD1L1</i>  | 8          | 0.322       | 0.346   | 0.024      | 8.95E-06 | 0.482            |
| cg05798339  |                 | 3          | 0.344       | 0.359   | 0.015      | 1.13E-05 | 0.566            |
| cg21771773  |                 | 5          | 0.164       | 0.201   | 0.037      | 1.21E-05 | 0.566            |
| cg15766464  |                 | 5          | 0.477       | 0.505   | 0.029      | 1.37E-05 | 0.597            |
| cg20595752  | <i>TEAD3</i>    | 6          | 0.524       | 0.559   | 0.036      | 1.48E-05 | 0.610            |
| cg06926300  |                 | 10         | 0.159       | 0.168   | 0.008      | 1.64E-05 | 0.638            |
| cg11813497  | <i>FRMD4A</i>   | 10         | 0.767       | 0.817   | 0.050      | 1.87E-05 | 0.666            |
| cg24149528  |                 | 15         | 0.349       | 0.385   | 0.036      | 1.90E-05 | 0.666            |
| cg10068883  | <i>FAM166B</i>  | 9          | 0.595       | 0.637   | 0.043      | 2.10E-05 | 0.693            |
| cg11157260  |                 | 4          | 0.738       | 0.767   | 0.029      | 2.31E-05 | 0.693            |
| cg13206397  |                 | 16         | 0.891       | 0.881   | -0.010     | 2.37E-05 | 0.693            |
| cg16081285  | <i>CSRNP3</i>   | 2          | 0.139       | 0.159   | 0.020      | 2.37E-05 | 0.693            |
| cg19453818  | <i>CAV2</i>     | 7          | 0.408       | 0.438   | 0.030      | 2.70E-05 | 0.726            |
| cg15688339  |                 | 5          | 0.384       | 0.446   | 0.062      | 2.83E-05 | 0.726            |
| cg03770646  |                 | 19         | 0.640       | 0.677   | 0.038      | 3.07E-05 | 0.726            |
| cg06372850  |                 | 2          | 0.222       | 0.265   | 0.043      | 3.07E-05 | 0.726            |
| cg14644418  | <i>FOXI2</i>    | 10         | 0.824       | 0.852   | 0.028      | 3.23E-05 | 0.726            |
| cg25072920  | <i>TCN1</i>     | 11         | 0.944       | 0.940   | -0.004     | 3.39E-05 | 0.726            |

364

365

366

367 Table 3 Top differentially methylated CpG sites between *in utero* maternal tobacco exposure and the  
 368 interaction with CP. Beta values with P values, nominal and adjusted by the Benjamini and Hochberg  
 369 method. Locations relative to hg19 with gene names for overlapping genes or nearest 5' gene.

370

| Illumina ID | Gene            | Chromosome | <i>In utero</i><br>maternal<br>tobacco<br>exposed<br>low CP | <i>In utero</i><br>maternal<br>tobacco<br>exposed<br>high CP | Difference | P value  | Adjusted P<br>value |
|-------------|-----------------|------------|-------------------------------------------------------------|--------------------------------------------------------------|------------|----------|---------------------|
| cg12163448  | <i>FASTKD1</i>  | 2          | 0.142                                                       | 0.155                                                        | 0.013      | 1.01E-06 | 0.459               |
| cg01210554  |                 | 7          | 0.060                                                       | 0.061                                                        | 0.001      | 1.31E-06 | 0.459               |
| cg13339919  | <i>SLC10A7</i>  | 4          | 0.9457                                                      | 0.9456                                                       | -0.0001    | 2.08E-06 | 0.486               |
| cg21516989  | <i>LPIN1</i>    | 2          | 0.946                                                       | 0.947                                                        | 0.001      | 6.89E-06 | 0.962               |
| cg17343033  |                 | 5          | 0.881                                                       | 0.882                                                        | 0.001      | 8.08E-06 | 0.962               |
| cg01394525  | <i>LAMC3</i>    | 9          | 0.910                                                       | 0.915                                                        | 0.005      | 8.82E-06 | 0.962               |
| cg02809796  | <i>PCGF3</i>    | 4          | 0.9185                                                      | 0.9186                                                       | 0.0001     | 9.62E-06 | 0.962               |
| cg12361925  | <i>FAM134A</i>  | 2          | 0.043                                                       | 0.042                                                        | -0.001     | 1.37E-05 | 0.984               |
| cg23048036  | <i>CEP97</i>    | 3          | 0.808                                                       | 0.796                                                        | -0.012     | 1.71E-05 | 0.984               |
| cg05750962  |                 | 18         | 0.082                                                       | 0.083                                                        | 0.001      | 2.80E-05 | 0.984               |
| cg24835473  | <i>CHCHD6</i>   | 3          | 0.931                                                       | 0.929                                                        | -0.002     | 3.33E-05 | 0.984               |
| cg23399286  | <i>OC90</i>     | 8          | 0.8087                                                      | 0.8088                                                       | 0.0001     | 3.81E-05 | 0.984               |
| cg16546489  | <i>HSD17B1</i>  | 17         | 0.918                                                       | 0.915                                                        | -0.003     | 3.84E-05 | 0.984               |
| cg09692779  |                 | 15         | 0.923                                                       | 0.921                                                        | -0.003     | 3.88E-05 | 0.984               |
| cg14496346  |                 | 9          | 0.095                                                       | 0.094                                                        | -0.001     | 4.02E-05 | 0.984               |
| cg14420953  |                 | 6          | 0.938                                                       | 0.935                                                        | -0.003     | 4.10E-05 | 0.984               |
| cg09125477  | <i>C16orf91</i> | 16         | 0.102                                                       | 0.111                                                        | 0.009      | 4.11E-05 | 0.984               |
| cg11095011  |                 | 6          | 0.936                                                       | 0.935                                                        | -0.001     | 4.27E-05 | 0.984               |
| cg24753210  | <i>PPP1R14B</i> | 11         | 0.068                                                       | 0.066                                                        | -0.001     | 4.83E-05 | 0.984               |
| cg25849390  | <i>CCT6A</i>    | 7          | 0.884                                                       | 0.880                                                        | -0.004     | 5.21E-05 | 0.984               |
| cg13787134  | <i>PHF2</i>     | 9          | 0.9391                                                      | 0.9392                                                       | 0.0001     | 5.46E-05 | 0.984               |
| cg05858227  |                 | 13         | 0.947                                                       | 0.945                                                        | -0.002     | 5.58E-05 | 0.984               |
| cg18168310  |                 | 11         | 0.672                                                       | 0.686                                                        | 0.014      | 5.69E-05 | 0.984               |
| cg06923651  | <i>SPINK4</i>   | 9          | 0.437                                                       | 0.438                                                        | 0.001      | 6.06E-05 | 0.984               |
| cg04807567  | <i>MYO3B</i>    | 2          | 0.850                                                       | 0.848                                                        | -0.002     | 6.25E-05 | 0.984               |
| cg03243165  |                 | 2          | 0.9393                                                      | 0.9398                                                       | 0.0005     | 6.45E-05 | 0.984               |
| cg03492068  |                 | 17         | 0.9100                                                      | 0.9101                                                       | 0.0001     | 7.06E-05 | 0.984               |
| cg10671167  | <i>CDK13</i>    | 7          | 0.083                                                       | 0.084                                                        | 0.001      | 7.47E-05 | 0.984               |
| cg14778074  | <i>GABRA2</i>   | 4          | 0.110                                                       | 0.108                                                        | -0.002     | 7.60E-05 | 0.984               |
| cg09482386  | <i>CYB561</i>   | 17         | 0.941                                                       | 0.940                                                        | -0.002     | 8.47E-05 | 0.984               |

371

372

373

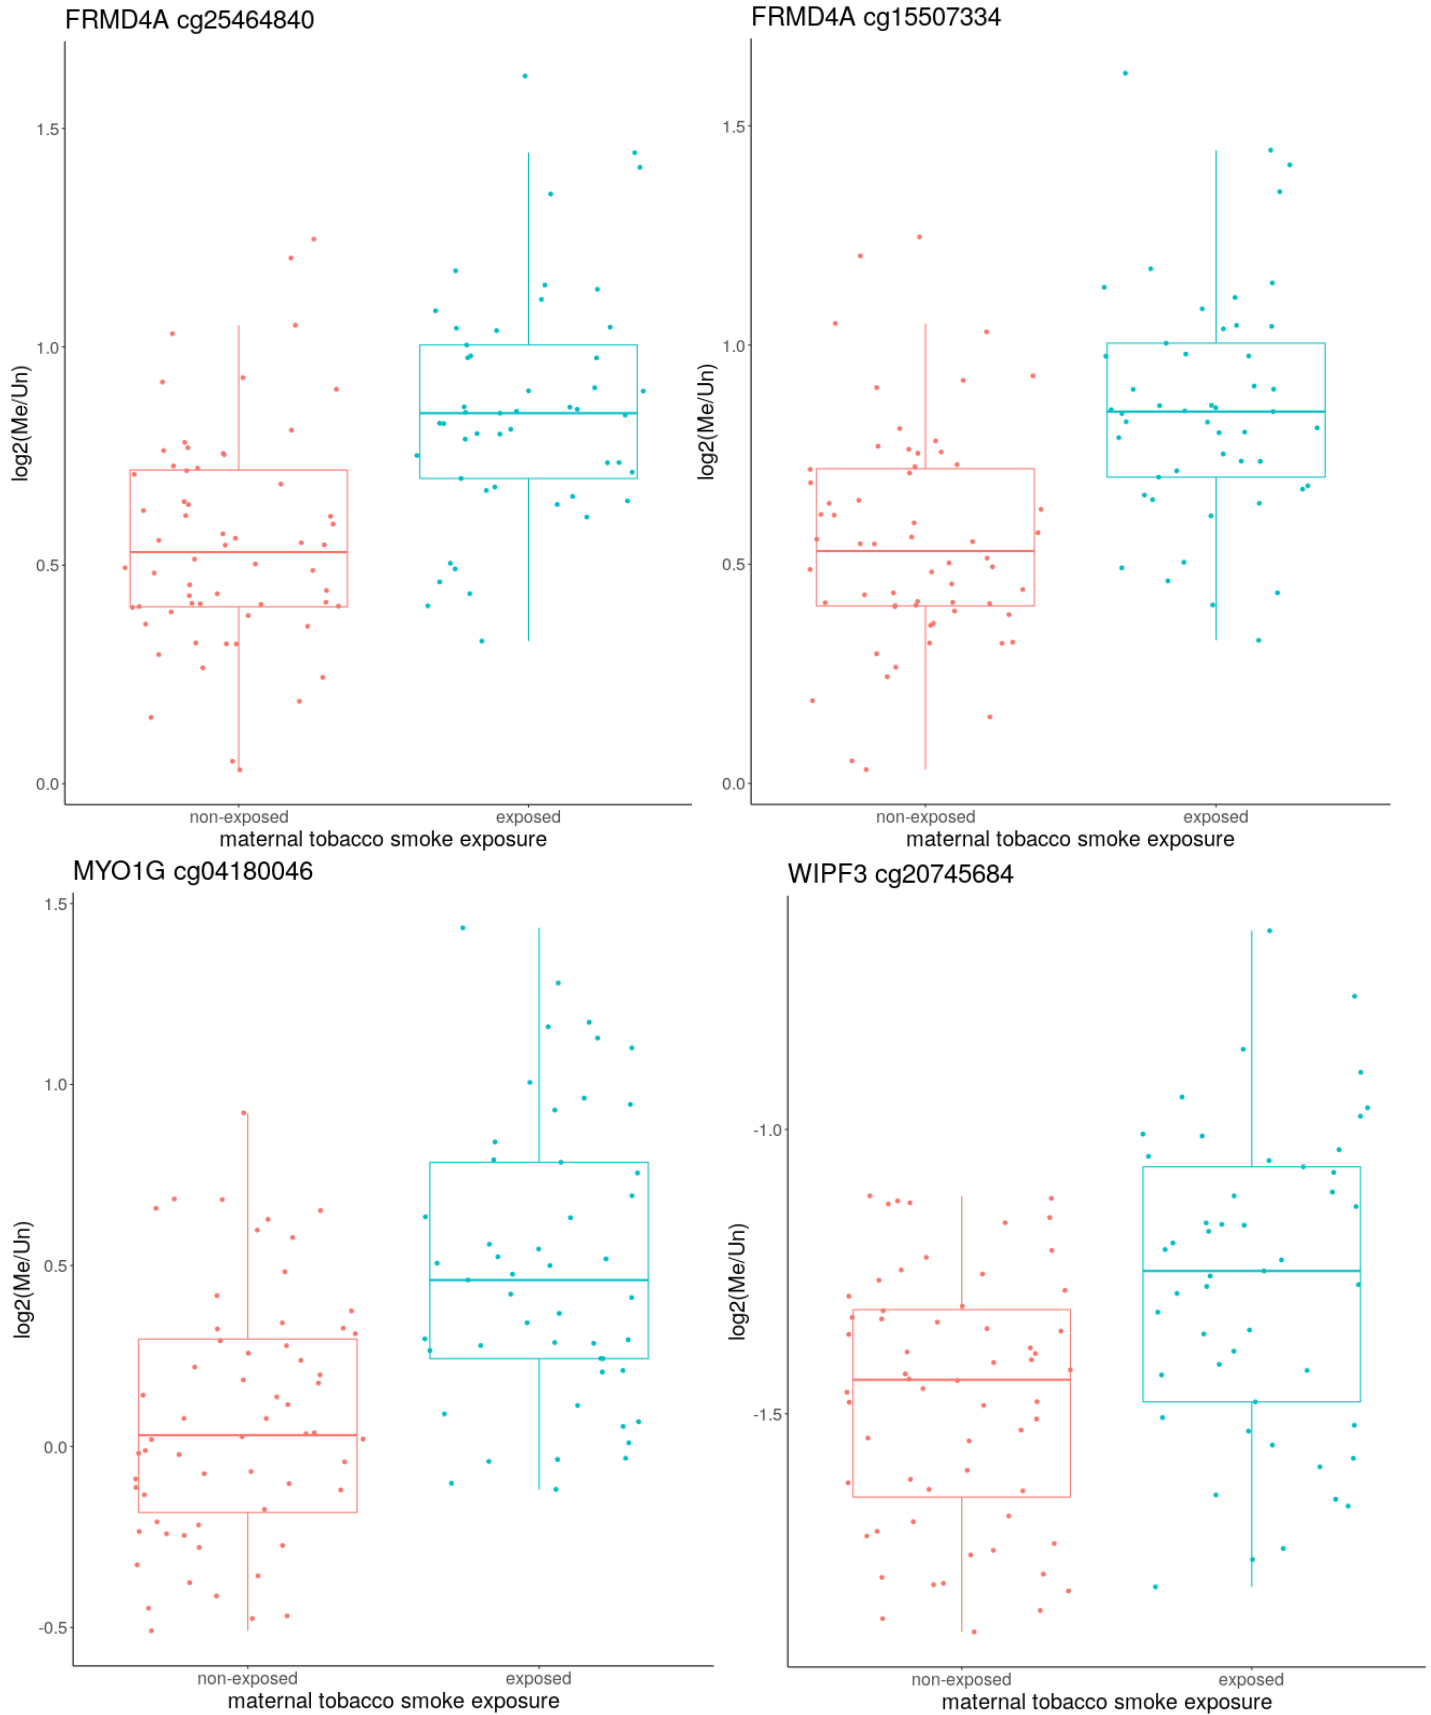

375 Figure 1- The top four CpG sites differentially methylated due to *in utero* maternal tobacco exposure,  
376 these sites resided in genes *FRMD4A*, *MYO1G* and *WIPF3*. The log transformed normalised beta  
377 values of the non- exposed individuals are seen on the left, with the exposed *in utero* to tobacco  
378 individuals on the right.

379

380

381

382

383

384

385

386

387

388

389

390

391

392

393

394

395

396

397

398

399

400

401



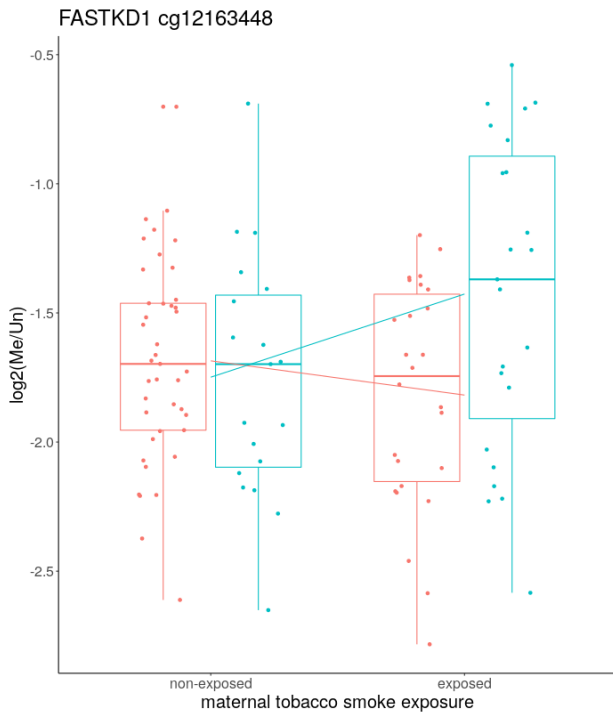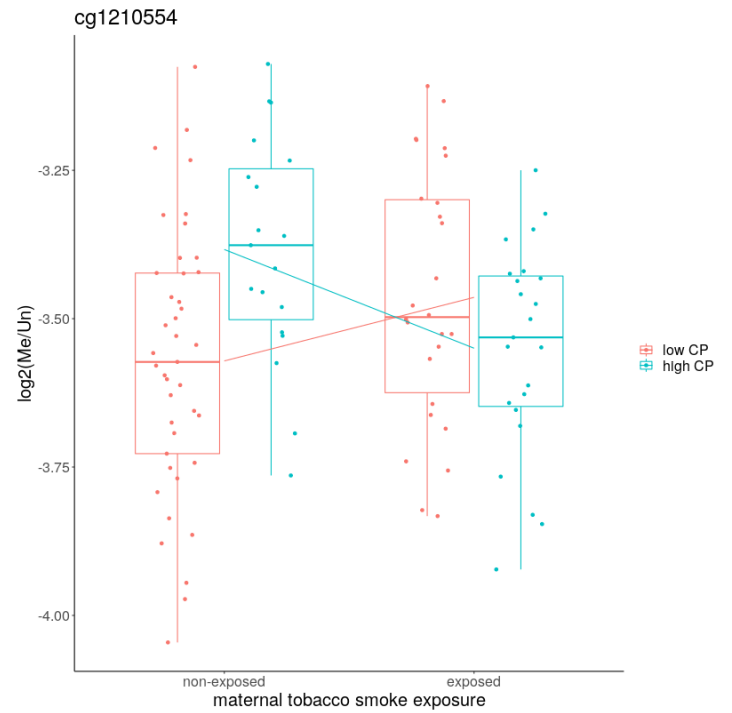

402

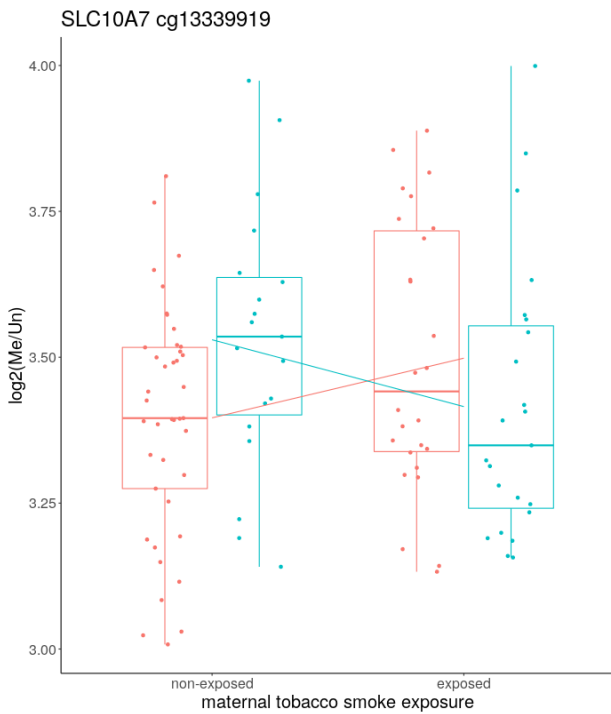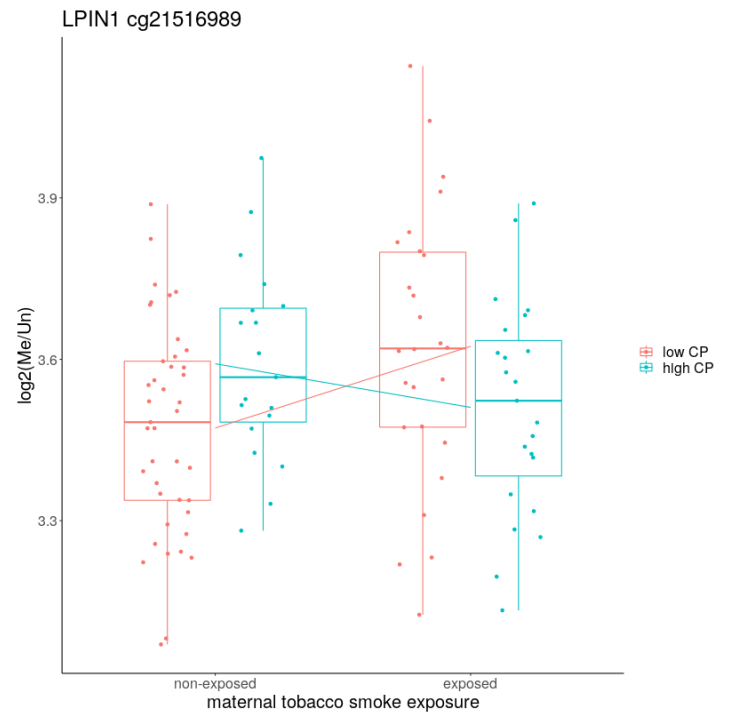

403

404

405

406

407

408 Figure 2 caption-

409 The top four most significantly differentially methylated (nominal  $P < 0.01$ ) CpG sites when *in utero* tobacco  
410 exposure was assessed with the interaction CP. Non-exposed individuals are plotted on the left of each plot,  
411 colour coded for either low CP (salmon) or high CP (cyan), with exposed individuals on the right. Lines from the  
412 non-exposed group to the exposed group represent the difference in average methylation between non-exposed  
413 and exposed with (salmon) and without (cyan) CP.

414

415

416

417

418

419

420

421

422

423

424

425

426

427

428

429

430

431

432

433

434

435

436

437

438

439

440

441

442

443 Supplementary Figure 1

444

**A**

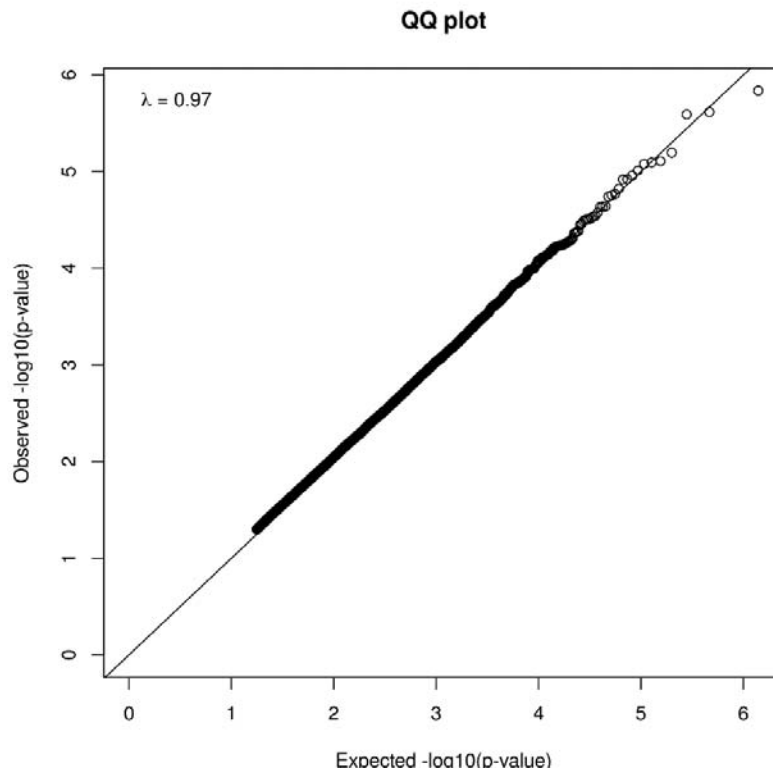

458

**B**

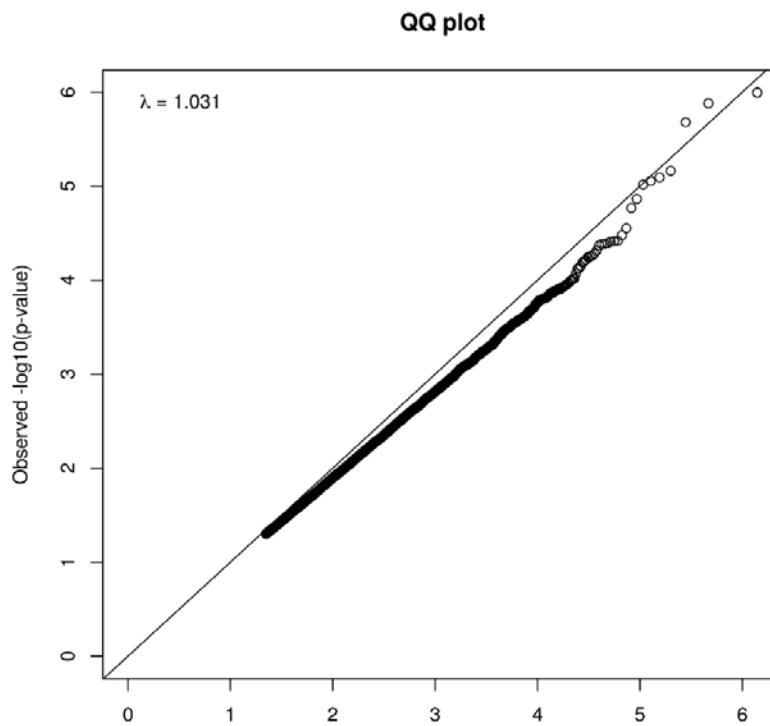

469

470

471

472

473

474

475

476

477

478

479

480

481

482

483

484

485

486

487 References

488

- 489 1. Castles, A., et al., *Effects of smoking during pregnancy. Five meta-analyses*. Am J Prev Med, 1999. **16**(3): p. 208-15.
- 490 2. Blatt, K., et al., *Association of reported trimester-specific smoking cessation with fetal growth*  
491 *restriction*. Obstet Gynecol, 2015. **125**(6): p. 1452-9.
- 492 3. Baardman, M.E., et al., *Combined adverse effects of maternal smoking and high body mass*  
493 *index on heart development in offspring: evidence for interaction?* Heart, 2012. **98**(6): p. 474-  
494 479.
- 495 4. Hayatbakhsh, M.R., et al., *Maternal smoking during and after pregnancy and lung function in*  
496 *early adulthood: a prospective study*. Thorax, 2009. **64**(9): p. 810-814.
- 497 5. Beyer, D., H. Mitfessel, and A. Gillissen, *Maternal smoking promotes chronic obstructive lung*  
498 *disease in the offspring as adults*. European Journal of Medical Research, 2009. **14**(4): p. 27.
- 499 6. Kandall, S.R. and J. Gaines, *Maternal substance use and subsequent Sudden Infant Death*  
500 *Syndrome (SIDS) in offspring*. Neurotoxicology and Teratology, 1991. **13**(2): p. 235-240.
- 501 7. Andrews, A., et al., *Smoking prevalence trends: An analysis of smoking at pregnancy*  
502 *registration and at discharge from a midwife Lead Maternity Carer, 2008 to 2010*. New  
503 Zealand College of Midwives Journal, 2014. **49**.
- 504 8. Health, M.o., *Annual Update of Key Results 2017/18*, N.Z.H. Survey, Editor. 2018, In, Ministry  
505 of Health: Wellington, Ministry of Health.
- 506 9. Indredavik, M.S., et al., *Prenatal smoking exposure and psychiatric symptoms in adolescence*.  
507 Acta paediatrica (Oslo, Norway : 1992), 2007. **96**(3): p. 377-382.
- 508

- 509 10. Ekblad, M., et al., *Prenatal Smoking Exposure and the Risk of Psychiatric Morbidity Into*  
510 *Young Adulthood*. Archives of General Psychiatry, 2010. **67**(8): p. 841-849.
- 511 11. Fergusson, D.M., L.J. Woodward, and L.J. Horwood, *Maternal Smoking During Pregnancy and*  
512 *Psychiatric Adjustment in Late Adolescence*. Archives of General Psychiatry, 1998. **55**(8): p.  
513 721-727.
- 514 12. Pratt, T.C., J.M. McGloin, and N.E. Fearn, *Maternal Cigarette Smoking During Pregnancy and*  
515 *Criminal/Deviant Behavior: A Meta-Analysis*. International Journal of Offender Therapy and  
516 Comparative Criminology, 2006. **50**(6): p. 672-690.
- 517 13. Brennan, P.A., E.R. Grekin, and S.A. Mednick, *Maternal smoking during pregnancy and adult*  
518 *male criminal outcomes*. Arch Gen Psychiatry, 1999. **56**(3): p. 215-9.
- 519 14. Roza, S.J., et al., *Maternal smoking during pregnancy and child behaviour problems: the*  
520 *Generation R Study*. International Journal of Epidemiology, 2008. **38**(3): p. 680-689.
- 521 15. Gaysina, D., et al., *Maternal smoking during pregnancy and offspring conduct problems:*  
522 *evidence from 3 independent genetically sensitive research designs*. JAMA psychiatry, 2013.  
523 **70**(9): p. 956-963.
- 524 16. Langley, K., et al., *Maternal smoking during pregnancy as an environmental risk factor for*  
525 *attention deficit hyperactivity disorder behaviour. A review*. Minerva Pediatr, 2005. **57**(6): p.  
526 359-71.
- 527 17. Kazdin, A.E., *Practitioner review: Psychosocial treatments for conduct disorder in children*.  
528 Child Psychology & Psychiatry & Allied Disciplines, 1997. **38**(2): p. 161-178.
- 529 18. Zeilinger, S., et al., *Tobacco smoking leads to extensive genome-wide changes in DNA*  
530 *methylation*. 2013. **8**(5): p. e63812.
- 531 19. Breton, C.V., et al., *Prenatal tobacco smoke exposure affects global and gene-specific DNA*  
532 *methylation*. 2009. **180**(5): p. 462-467.
- 533 20. Ambatipudi, S., et al., *Tobacco smoking-associated genome-wide DNA methylation changes*  
534 *in the EPIC study*. 2016. **8**(5): p. 599-618.
- 535 21. Gluckman, P.D., M.A. Hanson, and T. Buklijas, *A conceptual framework for the*  
536 *developmental origins of health and disease*. Journal of Developmental Origins of Health and  
537 Disease, 2009. **1**(1): p. 6-18.
- 538 22. Sengupta, S.M., et al., *Locus-specific DNA methylation changes and phenotypic variability in*  
539 *children with attention-deficit hyperactivity disorder*. Psychiatry Research, 2017. **256**: p. 298-  
540 304.
- 541 23. Joubert, B.R., et al., *450K epigenome-wide scan identifies differential DNA methylation in*  
542 *newborns related to maternal smoking during pregnancy*. Environ Health Perspect, 2012.  
543 **120**(10): p. 1425-31.
- 544 24. Joubert, B.R., et al., *DNA Methylation in Newborns and Maternal Smoking in Pregnancy:*  
545 *Genome-wide Consortium Meta-analysis*. Am J Hum Genet, 2016. **98**(4): p. 680-96.
- 546 25. Joubert Bonnie, R., et al., *450K Epigenome-Wide Scan Identifies Differential DNA Methylation*  
547 *in Newborns Related to Maternal Smoking during Pregnancy*. Environmental Health  
548 Perspectives, 2012. **120**(10): p. 1425-1431.
- 549 26. Richmond, R.C., et al., *Prenatal exposure to maternal smoking and offspring DNA*  
550 *methylation across the lifecourse: findings from the Avon Longitudinal Study of Parents and*  
551 *Children (ALSPAC)*. Human Molecular Genetics, 2014. **24**(8): p. 2201-2217.
- 552 27. Richmond, R.C., et al., *Prenatal exposure to maternal smoking and offspring DNA*  
553 *methylation across the lifecourse: findings from the Avon Longitudinal Study of Parents and*  
554 *Children (ALSPAC)*. Human molecular genetics, 2015. **24**(8): p. 2201-2217.
- 555 28. Lee, K.W., Richmond, R., Hu, P., French, L., Shin, J., Bourdon, C., ... Pausova, Z. (2015).  
556 Prenatal exposure to maternal cigarette smoking and DNA methylation: epigenome-wide  
557 association in a discovery sample of adolescents and replication in an independent cohort at  
558 birth through 17 years of age. Environmental health perspectives, 123(2), 193–199.  
559 doi:10.1289/ehp.1408614.

- 560 29. Parmar, P., et al., *Association of maternal prenatal smoking GFI1-locus and cardio-metabolic*  
561 *phenotypes in 18,212 adults*. EBioMedicine, 2018. **38**: p. 206-216.
- 562 30. Rutter M, T.J., Whitmore K, *Education, Health and Behaviour*. London: Longmans, 1970.
- 563 31. Conners, C.K., *Symptom patterns in hyperkinetic, neurotic, and normal children*. Child  
564 Development, 1970. **41**(3): p. 667-682.
- 565 32. Conners, C.K., *A teacher rating scale for use in drug studies with children*. The American  
566 Journal of Psychiatry, 1969. **126**(6): p. 884-888.
- 567 33. Fergusson, D.M., L.J. Horwood, and M. Lloyd, *Confirmatory factor models of attention deficit*  
568 *and conduct disorder*. J Child Psychol Psychiatry, 1991. **32**(2): p. 257-74.
- 569 34. Fergusson, D.M., L.J. Horwood, and E.M. Ridder, *Show me the child at seven: the*  
570 *consequences of conduct problems in childhood for psychosocial functioning in adulthood*. J  
571 Child Psychol Psychiatry, 2005. **46**(8): p. 837-49.
- 572 35. Pidsley, R., et al., *Critical evaluation of the Illumina MethylationEPIC BeadChip microarray for*  
573 *whole-genome DNA methylation profiling*. Genome Biology, 2016. **17**(1): p. 208.
- 574 36. Triche, T.J., Jr, et al., *Low-level processing of Illumina Infinium DNA Methylation BeadArrays*.  
575 Nucleic Acids Research, 2013. **41**(7): p. e90-e90.
- 576 37. Pearson, J.F., et al., *Increased risk of major depression by childhood abuse is not modified by*  
577 *CNR1 genotype*. 2013(2): p. 224.
- 578 38. Lawrence, M., et al., *Software for computing and annotating genomic ranges*. PLoS  
579 computational biology, 2013. **9**(8).
- 580 39. Wickham, H., *ggplot2: Elegant Graphics for Data Analysis*. 2016: Springer-Verlag New York.
- 581 40. Küpers, L.K., et al., *DNA methylation mediates the effect of maternal smoking during*  
582 *pregnancy on birthweight of the offspring*. International Journal of Epidemiology, 2015.  
583 **44**(4): p. 1224-1237.
- 584 41. Wiklund, P., et al., *DNA methylation links prenatal smoking exposure to later life health*  
585 *outcomes in offspring*. Clinical Epigenetics, 2019. **11**(1): p. 97.
- 586 42. Vives-Usano, M., et al., *In utero and childhood exposure to tobacco smoke and multi-layer*  
587 *molecular signatures in children*. BMC Medicine, 2020. **18**(1): p. 243.
- 588 43. Pierce, R.A., et al., *The HA-2 minor histocompatibility antigen is derived from a diallelic gene*  
589 *encoding a novel human class I myosin protein*. J Immunol, 2001. **167**(6): p. 3223-30.
- 590 44. Lambert, J.C., et al., *Genome-wide haplotype association study identifies the FRMD4A gene*  
591 *as a risk locus for Alzheimer's disease*. Molecular Psychiatry, 2013. **18**(4): p. 461-470.
- 592 45. Simarro, M., et al., *Fast kinase domain-containing protein 3 is a mitochondrial protein*  
593 *essential for cellular respiration*. Biochemical and biophysical research communications,  
594 2010. **401**(3): p. 440-446.
- 595 46. Boehm, E., et al., *FASTKD1 and FASTKD4 have opposite effects on expression of specific*  
596 *mitochondrial RNAs, depending upon their endonuclease-like RAP domain*. Nucleic acids  
597 research, 2017. **45**(10): p. 6135-6146.
- 598 47. Information, N.C.f.B. *NM\_024622.6(FASTKD1):c.2230T>A (p.Tyr744Asn)*. [VCV000548952.1],  
599 July,17th, 2018 24 Nov 2020].
- 600 48. DeCarlo, D.K., et al., *Prevalence of attention-deficit/hyperactivity disorder among children*  
601 *with vision impairment*. Journal of American Association for Pediatric Ophthalmology and  
602 Strabismus, 2014. **18**(1): p. 10-14.
- 603 49. Wang, H., et al., *Genome-wide interaction analysis of pathological hallmarks in Alzheimer's*  
604 *disease*. Neurobiol Aging, 2020. **93**: p. 61-68.
- 605 50. Barak, T., et al., *Recessive LAMC3 mutations cause malformations of occipital cortical*  
606 *development*. Nature genetics, 2011. **43**(6): p. 590-594.
- 607 51. Urgan, B.M., et al., *Homozygous LAMC3 mutation links to structural and functional changes*  
608 *in visual attention networks*. NeuroImage, 2019. **190**: p. 242-253.
- 609 52. Barak, T., et al., *Recessive LAMC3 mutations cause malformations of occipital cortical*  
610 *development*. Nature Genetics, 2011. **43**(6): p. 590-594.

611 53. Kazdin, A.E., *Conduct Disorders in Childhood and Adolescence*. 1995: SAGE Publications.

612
